# Supplementary material for: Melatonin Treatment Maintains the Quality of Fresh-cut Gastrodia elata Under Low Temperature Conditions by Regulating Reactive Oxygen Species Metabolism and Phenylpropanoid Pathway
Source: Preprints.org preprint supplement (doi:10.20944/preprints202308.1713.v1), 2023-08-24
Supplement: Supplementary file 3 [file supplementary]

Melatonin Treatment Maintains the Quality of Fresh-Cut *Gastrodia elata* Under Low Temperature Conditions by Regulating Reactive Oxygen Species Metabolism and Phenylpropanoid Pathway

Boyu Donga,b,*, Fangfang Daa,b, Yulong Chen a,b, Xiaochun Dingc,*

**Supplementary material**

**Table S1** Primer sequences used for real-time PCR.

| Gene | Primer sequence |
| --- | --- |
| *GeSOD* | Forward: GAGGGCTTTGTTGAAGTTTGTGATG |
|  | Reverse: CCTTCCTGATTTGCCATACGACTAC |
| *GeCAT* | Forward: CTTGCCTTCTGCCCGTCAATC |
|  | Reverse: GCATTTGGAGGGAGCATGAGATAG |
| *GePOD* | Forward: GCTGTGATGCCTCAATTATGCTTG |
|  | Reverse: GCCTCTAGCTGTGTCTTGATTCTG |
| *GePPO* | Forward: GCCAACATCGACCGCATCTG |
|  | Reverse: TCTCTGACTCTGACCCTAACTAGC |
| *GeAPX* | Forward: CGTAAGGGCGGAAAACTGGATC |
|  | Reverse: GAGCTGCTGAAAGGAGAATCGG |
| *GeGR* | Forward: TTGAAGCTAACAGAGTTGAGGTGAC |
|  | Reverse: ACGGCTCCCAGTTGCAATTAAG |
| *GeMDHAR* | Forward: ACCTGCCGTACTTCTACTCTCG |
|  | Reverse: GACCACCCTCCCATCCTTGAC |
| *GeDHAR* | Forward: ACCACTCTGGTTTGTTCGCA |
|  | Reverse: ACTGAGCAACAACACTCCGT |
| *GePAL* | Forward: CCCAGGTCTCGTGCGTCGTTCT |
|  | Reverse: TTTTACCTCTTGCCCGTGCGTT |
| *GeC4H* | Forward: CAGAGCCAGACACGCACAAGC |
|  | Reverse: TAGGGAGACGACCACGGAGTG |
| *Ge4CL* | Forward: CCTCGGCTGCTGACTGACTG |
|  | Reverse: GGTTGCGTTGGTCTCGCCTC |
| *GeActin* | Forward: GCGACAATGGAACTGGAATGG |
|  | Reverse: TCGCCAGAATCCAGCACAAT |
